# Supplementary material for: Processing of emotional connotations in Chinese monomorphic and compound words reflected by the early posterior negativity
Source: Frontiers journal article supplement (doi:10.3389/fpsyg.2024.1426383), 2024-08-09
Supplement: Data_Sheet_1.PDF [file Data_Sheet_1.PDF]

## Supplementary Material

### 1 Supplementary Figures

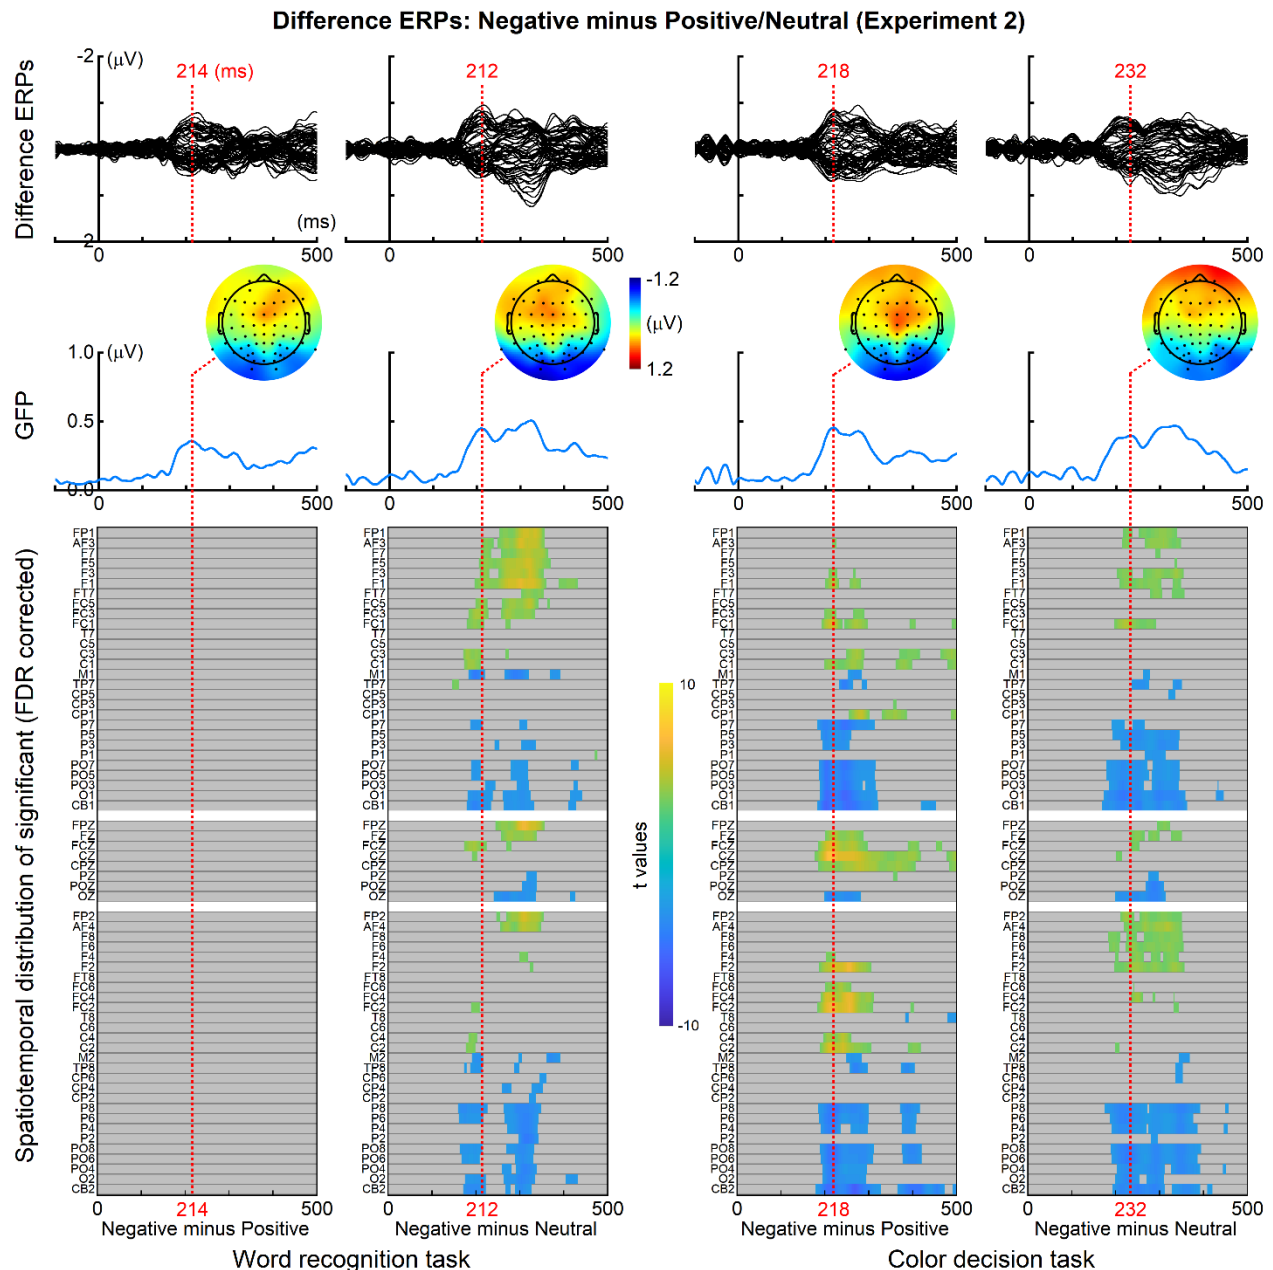

**Figure S1. ERP differences between negative and positive/neutral words (Experiment 2).** Top panels: Grand-averaged difference ERPs across all 64 recording electrodes, obtained by subtracting ERPs elicited by negative words from those elicited by positive/neutral words. Middle panels: Global field power (GFP) plots representing the computed GFP of the difference ERPs for each task. Bottom panels: Spatiotemporal distribution of significant time points resulting from repeated-measures two-

tailed  $t$ -tests conducted on ERPs elicited by emotional and neutral words at each electrode across time points from 50 to 500 ms.

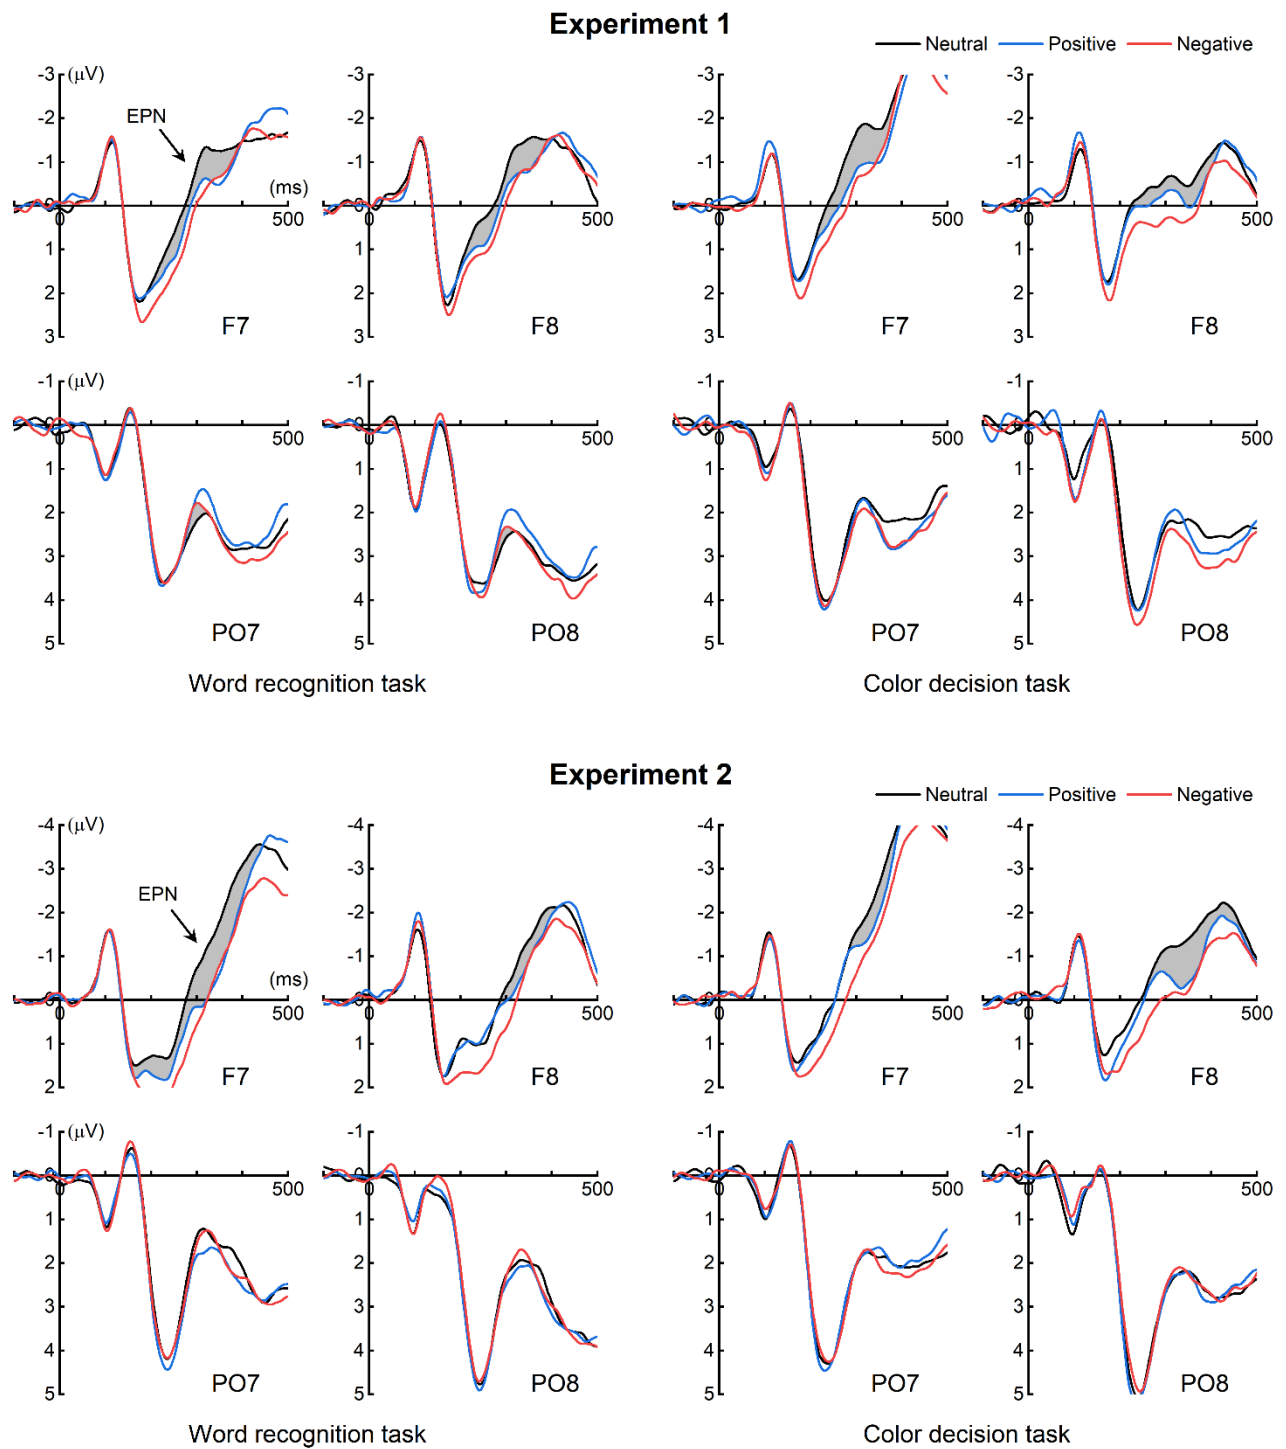

**Figure S2. Grand-averaged ERPs (re-reference to mean mastoids).** For both experiments, the EPN was evident in the frontal region but scarcely observable at the posterior electrode sites.

## 2 Supplementary Tables

| Known words                                        |                                                    |                                                    | Unknown words (Rare words)                       |                                                     |                                                   |
|----------------------------------------------------|----------------------------------------------------|----------------------------------------------------|--------------------------------------------------|-----------------------------------------------------|---------------------------------------------------|
| Positive                                           | Negative                                           | Neutral                                            |                                                  |                                                     |                                                   |
| 真笑爱益喜吉朋智恩康侠幸奖妙奋赏恋欣寿祝吻愉甜悦孝财欢善香宝玩丽诚勇敢庆荣伴忠净祥贺俊帅夸旺宠娱萌俏 | 死离病害杀苦伤痛恶危坏罪败恨恐损毒怨烂残悲患烦疾灾贬丧污骂腥骗惨伪盗脏惩辱忌奸葬窃险淫讽哀坟冤诈疮贱 | 表声院城船铁岛闻楼票港普馆塔库售袋矿岩陆室钟椅瓶池峡铜齿岗座盐壳胃柴柜亭盆盒框伞渠砖饼巷桶壶言洞浆话 | 芟苫恚笏杳杲茱罍裂芥芼贯昇窆惹竿姜槩莛芙萑盍荼菡采仝莽莧脊荇訾崇昃否苔藁竒豈覓若筇罌苕苎葦蓂芴簪 | 肯盪瞢置衰恧美莉茺笹蒹蒺置蔽耄孟瞽叅衰奕邠乂劬衿彤颀绂砉沔觥觊觐销郤刵眈汜旣睨阝仿经訢埭紬覬狙靴紻邶舫 | 郁觊觎洧眖邠邠玷淹睦邶眇聃坰埴卸桎栝轳徂泐吁眙眢附聆貯仇祐郭跼剖矸秬睞蹊𡗗度阅闾灼处庠迺达飏馗遶迨 |

**Table S1. Stimuli used in Experiment 1**

| Positive | Known words |         | Unknown words (Pseudowords) |    |    |
|----------|-------------|---------|-----------------------------|----|----|
|          | Negative    | Neutral |                             |    |    |
| 漂亮       | 敌人          | 玻璃      | 身果                          | 贸饮 | 闯元 |
| 快乐       | 逼迫          | 进入      | 次度                          | 曹幼 | 圳葡 |
| 满意       | 可怕          | 脑袋      | 报才                          | 忍页 | 仑芝 |
| 敬仰       | 悲痛          | 报纸      | 接必                          | 躺钢 | 懒吁 |
| 舒服       | 愤怒          | 椅子      | 治展                          | 奈扣 | 罗陕 |
| 勇气       | 失望          | 普通      | 象双                          | 拨滴 | 浦讶 |
| 关怀       | 批评          | 晚饭      | 张卖                          | 筹丛 | 脾弓 |
| 享受       | 难过          | 胳膊      | 转夫                          | 紫仲 | 舟吼 |
| 礼物       | 委屈          | 浴室      | 位该                          | 遥吕 | 僚沫 |
| 灿烂       | 忧郁          | 隐秘      | 标谈                          | 坛沈 | 柄坑 |
| 良心       | 病毒          | 基本      | 众构                          | 敲纹 | 芒湘 |
| 活泼       | 棺材          | 接近      | 律足                          | 侯抖 | 筋兆 |
| 笑脸       | 残酷          | 月饼      | 斗束                          | 炼恒 | 厘焰 |
| 宝贝       | 尸体          | 变化      | 神各                          | 臣纺 | 宛咸 |
| 庄严       | 欺骗          | 摆动      | 倒旅                          | 弥围 | 弦坠 |
| 崇拜       | 埋怨          | 对称      | 承盖                          | 肚染 | 谱煌 |
| 潇洒       | 凄凉          | 店员      | 盟更                          | 抚亚 | 溶俯 |
| 乖巧       | 不屑          | 长期      | 袄恪                          | 仆郭 | 烛硕 |
| 奇迹       | 流氓          | 水缸      | 掉括                          | 宇乳 | 松勿 |
| 香味       | 汉奸          | 散发      | 编凌                          | 添摩 | 郡昆 |
| 体面       | 囚犯          | 抽屉      | 晋毫                          | 垒蒋 | 斯甸 |
| 信念       | 损害          | 编辑      | 侃咪                          | 挣汪 | 茂栗 |
| 贡献       | 憔悴          | 打印      | 端逸                          | 车讲 | 拢喏 |
| 积极       | 伤口          | 奔走      | 咽泽                          | 朵中 | 泼咨 |
| 亲密       | 恶心          | 相同      | 伦岸                          | 寸扔 | 枢姚 |
| 幽默       | 痛苦          | 固定      | 载洛                          | 丘匹 | 矣蒲 |
| 深情       | 虚伪          | 圆形      | 跳套                          | 苗肠 | 刮郊 |
| 完美       | 地狱          | 连绵      | 练搬                          | 韵笼 | 爪陡 |
| 自豪       | 轻蔑          | 弯曲      | 卷坦                          | 挡纲 | 晒确 |
| 掌声       | 冤枉          | 笔直      | 祖丝                          | 卧膜 | 咳衔 |
| 表扬       | 害怕          | 档案      | 蒙管                          | 苟纳 | 巩绢 |
| 欣赏       | 堕落          | 胡须      | 弄则                          | 窝睁 | 媳姜 |
| 梦想       | 鸦片          | 澡盆      | 替塞                          | 铃填 | 带沾 |
| 向往       | 下贱          | 悠长      | 栈戎                          | 扮杆 | 曾早 |
| 尊严       | 烦闷          | 侧面      | 街促                          | 邵胎 | 疏咕 |
| 福气       | 混蛋          | 均匀      | 阮扎                          | 饱茫 | 杖绣 |
| 丰收       | 谣言          | 细密      | 搞山                          | 挨蓝 | 坎轿 |
| 诚恳       | 反感          | 信箱      | 芭茄                          | 丈乾 | 钻敦 |
| 友谊       | 晦气          | 成群      | 杠吭                          | 咐介 | 服沼 |
| 欢呼       | 刻薄          | 潮湿      | 奉旋                          | 泊肺 | 京涅 |
| 雅致       | 无耻          | 短暂      | 菲杯                          | 斑涛 | 衬俱 |
| 勤快       | 坟头          | 证明      | 绪粗                          | 盒温 | 昌兜 |
| 机智       | 遗物          | 橡皮      | 皆租                          | 玦拆 | 洪邓 |
| 杰作       | 陷阱          | 泳池      | 悄扫                          | 辽抹 | 桓汁 |
| 救星       | 厄运          | 化肥      | 手土                          | 倘冻 | 佣汝 |
| 愿望       | 狡猾          | 毛巾      | 贯侦                          | 驰栏 | 勒齐 |
| 喜讯       | 瞎话          | 绳索      | 皂燕                          | 每却 | 钓析 |
| 忠实       | 破坏          | 公共      | 泥扩                          | 顽颈 | 麻丐 |
| 奖状       | 墓碑          | 眼罩      | 拣牡                          | 收广 | 倚江 |
| 园丁       | 出殡          | 垂直      | 吃巡                          | 尉朴 | 茎緬 |

Table S2. Stimuli used in Experiment 2

### 3 Supplementary Discussion

## Inhibitory effect of orthographic processing of Chinese negative compound words

The emotional processing of negative words often appears to manifest an inhibitory effect. For instance, Ben-David et al. (2012) identified an emotional Stroop effect, where individuals exhibited slower response times in naming the ink color of negative emotion-laden words compared to neutral words. Similarly, Estes and Verges (2008) documented that negative words (e.g., “spider”) were associated with slower lexical decisions. Additionally, Kuperman et al. (2014) found that greater negativity generally resulted in slower reaction times for lexical decision and naming tasks. This inhibitory effect may be reflected in the modulation of P1 or N170 ERP components (Scott et al., 2009; Bayer et al., 2012; Yao et al., 2016), which could signify the prioritized attraction of attention by negative stimuli (Ohman and Mineka, 2001), an adaptive response to negative stimuli (Grandjean and Scherer, 2008), or a lack of control over variables such as familiarity (for a review see Hinojosa et al., 2020).

Although the lexical decision times to positive, negative, and neutral words were not available in the present study, the ERP results revealed a potential inhibitory effect of emotional processing on negative words. Specifically, in Experiment 2, differences in ERP responses to negative words compared to neutral words were observed not only around 300 ms (i.e., the EPN) but also around 220 ms (see Figure S1). The ERP difference around 220 ms was also observed when comparing negative and positive words (see Figure S1). In contrast, the 220 ms difference was not observed when comparing positive and neutral words (see Figure 4 in the main text). The time course and spatial distribution of the ERP difference around 220 ms align with the ERP signature of accessing lexical orthographic representations of Chinese words (Yu et al., 2022; Huang et al., 2023; Zhang et al., 2023). Therefore, the ERP difference around 220 ms may suggest attenuated lexical orthographic processing of negative words compared to neutral and positive words. These findings seem to support the notion of an inhibitory effect of emotional processing on negative words. However, this inhibitory effect was observed only in Experiment 2, which used compound words, and not in Experiment 1, which used monomorphemic words. Thus, the inhibitory effect might reflect inhibited whole-word orthographic processing of compound words. Consistently, Wu and Thierry (2012) found that Chinese compound words with a negative valence are not activated by their English translations as positive and neutral compound words are, which might also result from the inhibitory effect on the orthographic lexical accessing of Chinese negative compound words.

The neural mechanisms underlying the inhibitory effect of emotional processing on negative words remain unclear (for a review see Hinojosa et al., 2020). The present study offers a perspective on the emotional processing of Chinese negative compound words, suggesting that the lexical orthographic representations of Chinese negative compound words may be less robust compared to those of neutral and positive compound words. However, this perspective is speculative and requires further investigation.

## 4 References

- Bayer, M., Sommer, W., and Schacht, A. (2012). P1 and beyond: functional separation of multiple emotion effects in word recognition. *Psychophysiology* 49(7), 959-969. doi: 10.1111/j.1469-8986.2012.01381.x.
- Ben-David, B.M., Chajut, E., and Algom, D. (2012). The Pale Shades of Emotion: A Signal Detection Theory Analysis of the Emotional Stroop Task. *Psychology* 03(07), 537-541. doi: 10.4236/psych.2012.37079.

- Estes, Z., and Verges, M. (2008). Freeze or flee? Negative stimuli elicit selective responding. *Cognition* 108(2), 557-565. doi: 10.1016/j.cognition.2008.03.003.
- Grandjean, D., and Scherer, K.R. (2008). Unpacking the cognitive architecture of emotion processes. *Emotion* 8(3), 341-351. doi: 10.1037/1528-3542.8.3.341.
- Hinojosa, J.A., Moreno, E.M., and Ferré, P. (2020). Affective neurolinguistics: towards a framework for reconciling language and emotion. *Language, Cognition and Neuroscience* 35(7), 813-839. doi: 10.1080/23273798.2019.1620957.
- Huang, B., Yang, X., Dong, S., and Gu, F. (2023). Visual event-related potentials reveal the early whole-word lexical processing of Chinese two-character words. *Neuropsychologia* 185, 108571. doi: 10.1016/j.neuropsychologia.2023.108571.
- Kuperman, V., Estes, Z., Brysbaert, M., and Warriner, A.B. (2014). Emotion and language: valence and arousal affect word recognition. *J Exp Psychol Gen* 143(3), 1065-1081. doi: 10.1037/a0035669.
- Ohman, A., and Mineka, S. (2001). Fears, phobias, and preparedness: toward an evolved module of fear and fear learning. *Psychol Rev* 108(3), 483-522. doi: 10.1037/0033-295x.108.3.483.
- Scott, G.G., O'Donnell, P.J., Leuthold, H., and Sereno, S.C. (2009). Early emotion word processing: evidence from event-related potentials. *Biol Psychol* 80(1), 95-104. doi: 10.1016/j.biopsycho.2008.03.010.
- Wu, Y.J., and Thierry, G. (2012). How reading in a second language protects your heart. *J Neurosci* 32(19), 6485-6489. doi: 10.1523/JNEUROSCI.6119-11.2012.
- Yao, Z., Yu, D., Wang, L., Zhu, X., Guo, J., and Wang, Z. (2016). Effects of valence and arousal on emotional word processing are modulated by concreteness: Behavioral and ERP evidence from a lexical decision task. *Int J Psychophysiol* 110, 231-242. doi: 10.1016/j.ijpsycho.2016.07.499.
- Yu, R., Chen, J., Peng, Y., and Gu, F. (2022). Visual event-related potentials reveal the early lexical processing of Chinese characters. *Neuropsychologia* 165, 108132. doi: 10.1016/j.neuropsychologia.2021.108132.
- Zhang, K., Gu, F., and Yu, H. (2023). Early lexical processing of Chinese one-character words and Mongolian words: A comparative study using event-related potentials. *Front Psychol* 13, 1061990. doi: 10.3389/fpsyg.2022.1061990.
